# Supplementary material for: In vitro physiological performance factors of a catalase-based biosensor for real-time electrochemical detection of brain hydrogen peroxide in freely-moving animals
Source: Royal Society of Chemistry journal article supplement (doi:10.1039/c6ay02190e), 2016-01-01
Supplement: c6ay02190e1.pdf [file c6ay02190e1.pdf]

## Supplementary Tables (S1-5)

### ***In vitro* physiological performance factors of a catalase-based biosensor for real-time electrochemical detection of brain hydrogen peroxide in freely-moving animals.**

Saidhbhe L. O'Riordan\*\* Kelly Mc Laughlin\* and John P. Lowry\*

#### **TEMPERATURE STUDIES**

| SENSOR TYPE | 37° C      |      |                |   | 35° C      |      |                |   | 40° C      |      |                |   |
|-------------|------------|------|----------------|---|------------|------|----------------|---|------------|------|----------------|---|
|             | Mean I, nA | SEM  | R <sup>2</sup> | n | Mean I, nA | SEM  | R <sup>2</sup> | n | Mean I, nA | SEM  | R <sup>2</sup> | n |
| PEROX       | 0.42       | 0.01 | 0.99           | 6 | 0.42       | 0.01 | 0.99           | 6 | 0.47       | 0.01 | 0.99           | 4 |

**S1a:** H<sub>2</sub>O<sub>2</sub> sensitivity of *PEROX* sensors at different experimental temperature conditions. Data is represented as a Mean ± SEM, nA.

| SENSOR TYPE | 37° C      |     |   | 35° C      |     |   | 40° C      |     |   |
|-------------|------------|-----|---|------------|-----|---|------------|-----|---|
|             | Mean I, pA | SEM | n | Mean I, pA | SEM | n | Mean I, pA | SEM | n |
| CONTROL     | 7.4        | 1.2 | 6 | 15.6       | 0.3 | 6 | 18.0       | 0.3 | 4 |

**S1b:** H<sub>2</sub>O<sub>2</sub> sensitivity of *CONTROL* sensors at different experimental temperature conditions. Data is represented as a Mean ± SEM, pA.

#### **pH STUDIES**

| SENSOR TYPE | 7.4        |       |                |    | 6.5        |       |                |   | 8.0        |       |                |   |
|-------------|------------|-------|----------------|----|------------|-------|----------------|---|------------|-------|----------------|---|
|             | Mean I, nA | SEM   | R <sup>2</sup> | n  | Mean I, nA | SEM   | R <sup>2</sup> | n | Mean I, nA | SEM   | R <sup>2</sup> | n |
| PEROX       | 0.472      | 0.003 | 0.99           | 24 | 0.470      | 0.002 | 0.99           | 4 | 0.480      | 0.002 | 0.99           | 6 |

**S2a:** H<sub>2</sub>O<sub>2</sub> sensitivity of *PEROX* sensors at different experimental pH conditions. Data is represented as a Mean ± SEM, nA.

| SENSOR TYPE | 7.4        |     |    | 6.5        |     |   | 8.0        |     |   |
|-------------|------------|-----|----|------------|-----|---|------------|-----|---|
|             | Mean I, pA | SEM | n  | Mean I, pA | SEM | n | Mean I, pA | SEM | n |
| CONTROL     | 5.6        | 0.1 | 24 | 32.6       | 1.1 | 4 | 14.4       | 0.1 | 4 |

**S2b:** H<sub>2</sub>O<sub>2</sub> sensitivity of *CONTROL* sensors at different experimental pH conditions. Data is represented as a Mean ± SEM, pA.

## **BIOCOMPATIBILITY STUDIES**

| <b>Day</b> | <b>Mean I,<br/>nA /<math>\mu</math>M</b> | <b>SEM</b> | <b>%</b> | <b>SEM (%)</b> | <b>R<sup>2</sup></b> | <b>n</b> |
|------------|------------------------------------------|------------|----------|----------------|----------------------|----------|
| <b>0</b>   | 0.30                                     | 0.001      | 100      | 0.42           | 0.99                 | 4        |
| <b>1</b>   | 0.26                                     | 0.001      | 87.51    | 0.23           | 0.99                 | 4        |
| <b>3</b>   | 0.24                                     | 0.002      | 78.75    | 0.53           | 0.99                 | 4        |
| <b>7</b>   | 0.21                                     | 0.001      | 70.76    | 0.34           | 0.99                 | 4        |
| <b>14</b>  | 0.22                                     | 0.001      | 73.46    | 0.44           | 0.99                 | 4        |
| <b>21</b>  | 0.24                                     | 0.002      | 78.49    | 0.75           | 0.99                 | 4        |
| <b>28</b>  | 0.24                                     | 0.003      | 80.65    | 1.04           | 0.99                 | 4        |

**S3: H<sub>2</sub>O<sub>2</sub> sensitivity of *PEROX* sensors treated with BT (1, 3, 7, 14, 21 and 28 days). Data is represented as a Mean  $\pm$  SEM, nA. The number of sensors is denoted by (n).**

| <b>Day</b> | <b>Mean I, pA/<math>\mu</math>M</b> | <b>SEM</b> | <b>n</b> |
|------------|-------------------------------------|------------|----------|
| <b>0</b>   | 2.0                                 | 0.1        | 4        |
| <b>1</b>   | 10.0                                | 0.1        | 4        |
| <b>3</b>   | 46.0                                | 0.1        | 4        |
| <b>7</b>   | 56.0                                | 0.1        | 4        |
| <b>14</b>  | 72.0                                | 0.1        | 4        |
| <b>21</b>  | 97.0                                | 0.1        | 4        |
| <b>28</b>  | 100.0                               | 0.1        | 4        |

**S4: H<sub>2</sub>O<sub>2</sub> sensitivity of *CONTROL* sensors treated with BT (1, 3, 7, 14, 21 and 28 days). Data is represented as a Mean  $\pm$  SEM, pA. The number of sensors is denoted by (n).**

| Day | Mean I, pA/ $\mu$ M | SEM | n |
|-----|---------------------|-----|---|
| 0   | 2.0                 | 0.1 | 4 |
| 1   | 9.0                 | 0.1 | 4 |
| 3   | 46.0                | 0.1 | 4 |
| 7   | 46.0                | 0.1 | 4 |
| 14  | 69.0                | 0.1 | 4 |
| 21  | 98.0                | 0.1 | 4 |
| 28  | 93.0                | 0.1 | 4 |

**S5: H<sub>2</sub>O<sub>2</sub> sensitivity of CONTROL sensors treated with BT (1, 3, 7, 14, 21 and 28 days) at a relatively lower concentration of H<sub>2</sub>O<sub>2</sub> (0–150  $\mu$ M). Data is represented as a Mean  $\pm$  SEM, pA. The number of sensors is denoted by (n).**

---

<sup>a</sup> †Neurochemistry Research Unit, BioAnalytics Laboratory, Department of Chemistry, Maynooth University, Maynooth, Co. Kildare, Ireland.

\*Corresponding author

E-mail: Saidhbhe.oriordan@nuim.ie

Tel: +353 1 708 6571.
